# Supplementary material for: Associations between Sociodemographic Factors, Lifestyle Behaviors, Pregnancy-Related Determinants, and Mediterranean Diet Adherence among Pregnant Women: The GESTAFIT Project
Source: MDPI journal article supplement (doi:10.3390/nu14071348), 2022-03-24
Supplement: s1 [file s1]

## **Supplementary Material**

Supplement to: **“Associations between sociodemographic factors, lifestyle behaviours, pregnancy-related determinants and Mediterranean diet adherence among pregnant women. The GESTAFIT project.”**

### **Table of contents**

**Supplementary Table S1.** Inclusion and exclusion criteria in the GESTAFIT project.

**Supplementary Figure S1.** Flow diagram of the study participants.

**Supplementary Table S2.** Differences in dietary habits by Mediterranean diet adherence (low Mediterranean diet adherence vs. high Mediterranean diet adherence).

**Supplementary Table S3.** Linear regression analysis assessing the association of dietary habits with overall physical fitness and physical fitness components.

**Supplementary Table S4.** Differences in dietary habits by meeting physical activity recommendations (not-meeting physical activity guidelines vs. meeting physical activity guidelines).

**Supplementary Table S5.** Differences in dietary habits by smoking status (current smoker vs no smoker).

**Supplementary Table S1.** Inclusion and exclusion criteria in the GESTAFIT project.

| <b>Inclusion criteria</b>                                                                                                                                                                                                                                                                                                                                                                                                                                                                                                                                                                                                                                                                                                                                                                                                                                                                                                                                                                                                                                 |
|-----------------------------------------------------------------------------------------------------------------------------------------------------------------------------------------------------------------------------------------------------------------------------------------------------------------------------------------------------------------------------------------------------------------------------------------------------------------------------------------------------------------------------------------------------------------------------------------------------------------------------------------------------------------------------------------------------------------------------------------------------------------------------------------------------------------------------------------------------------------------------------------------------------------------------------------------------------------------------------------------------------------------------------------------------------|
| <ul style="list-style-type: none"><li>- Pregnant women aged 25-40 years old with a normal pregnancy course.</li><li>- Answering “no” to all questions on the PARmed-X for pregnancy.</li><li>- Being able to walk without assistance.</li><li>- Being able to read and write properly.</li><li>- Informed consent: Being capable and willing to provide written consent.</li></ul>                                                                                                                                                                                                                                                                                                                                                                                                                                                                                                                                                                                                                                                                        |
| <b>Exclusion criteria</b>                                                                                                                                                                                                                                                                                                                                                                                                                                                                                                                                                                                                                                                                                                                                                                                                                                                                                                                                                                                                                                 |
| <ul style="list-style-type: none"><li>- Having acute or terminal illness.</li><li>- Having malnutrition.</li></ul> <p>Being unable to conduct tests for assessing physical fitness or exercise during pregnancy.</p> <ul style="list-style-type: none"><li>- Having pregnancy risk factors (such as hypertension, type 2 diabetes, etc.).</li><li>- Having a multiple pregnancy.</li><li>- Having chromosopathy or foetal malformations.</li><li>- Having uterine growth restriction.</li><li>- Having foetal death.</li><li>- Having upper or lower extremity fracture in the past 3 months.</li><li>- Suffering neuromuscular disease or presence of drugs affecting neuromuscular function.</li><li>- Being registered in another exercise program.</li><li>- Performing more than 300 minutes of at least moderate physical activity per week.</li><li>- Being engaged in another physical exercise program</li><li>- Being unwilling either to complete the study requirements or to be randomized into the control or intervention group.</li></ul> |

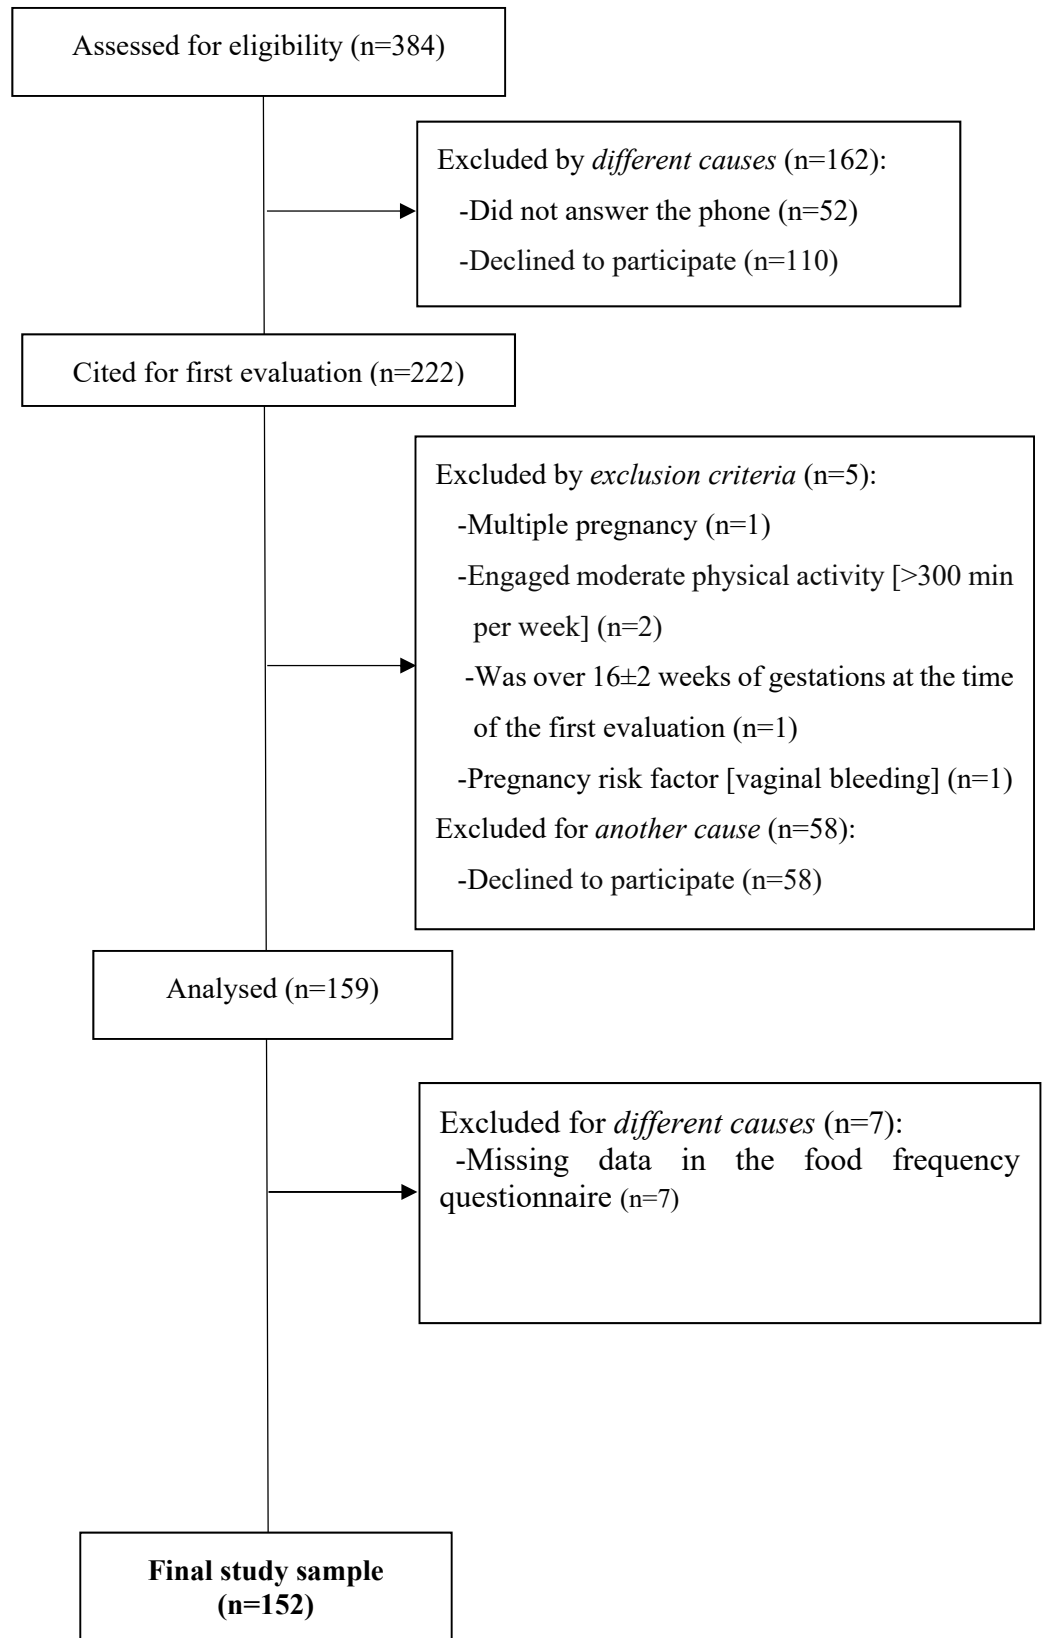

**Supplementary Figure S1.** Flow diagram of the study participants.

**Supplementary Table S2.** Differences in dietary habits by Mediterranean diet adherence (low Mediterranean diet adherence vs. high Mediterranean diet adherence).

|                                          | <b>Low Mediterranean<br/>diet adherence<br/>(n=89)</b> | <b>High Mediterranean<br/>diet adherence<br/>(n=63)</b> | <b><i>p</i></b>  |
|------------------------------------------|--------------------------------------------------------|---------------------------------------------------------|------------------|
| <i>Whole-grain cereals (s/week)</i>      | 2.8 (4.3)                                              | 6.6 (5.4)                                               | <b>&lt;0.001</b> |
| <i>Potatoes (s/week)</i>                 | 2.4 (1.3)                                              | 2.3 (1.2)                                               | 0.518            |
| <i>Fruits (s/week)</i>                   | 11.5 (5.3)                                             | 18.7 (6.5)                                              | <b>&lt;0.001</b> |
| <i>Vegetables (s/week)</i>               | 19.5 (9.1)                                             | 34.1 (11.1)                                             | <b>&lt;0.001</b> |
| <i>Pulses (s/week)</i>                   | 2.5 (1.1)                                              | 3.1 (1.3)                                               | <b>0.002</b>     |
| <i>Fish (s/week)</i>                     | 4.2 (1.9)                                              | 5.8 (2.4)                                               | <b>&lt;0.001</b> |
| <i>Red meat and subproducts (s/week)</i> | 6.0 (3.2)                                              | 4.8 (3.6)                                               | <b>0.032</b>     |
| <i>Poultry (s/week)</i>                  | 2.8 (1.2)                                              | 2.5 (4.5)                                               | 0.113            |
| <i>Dairy products (s/week)</i>           | 12.9 (8.3)                                             | 12.9 (8.8)                                              | 0.958            |
| <i>Olive oil (s/week)</i>                | 11.2 (6.6)                                             | 15.7 (6.5)                                              | <b>&lt;0.001</b> |
| <i>Nuts (s/week)</i>                     | 3.3 (7.8)                                              | 7.9 (5.7)                                               | <b>&lt;0.001</b> |
| <i>Sweets (s/week)</i>                   | 12.3 (7.6)                                             | 7.5 (4.1)                                               | <b>&lt;0.001</b> |

Values shown as mean (Standard deviation). S, servings.

**Supplementary Table S3.** Linear regression analysis assessing the association of dietary habits with overall physical fitness and physical fitness components.

|                                                          | Confidence<br>interval 95% (B) |         |         |        |              |
|----------------------------------------------------------|--------------------------------|---------|---------|--------|--------------|
|                                                          | B                              | $\beta$ | Lower   | Upper  | <i>p</i>     |
| <b>Cardiorespiratory fitness (m) (n=62)</b>              |                                |         |         |        |              |
| <i>Whole-grain cereals (s/week)</i>                      | 2.862                          | 0.316   | 0.639   | 5.084  | <b>0.012</b> |
| <i>Potatoes (s/week)</i>                                 | -9.129                         | -0.222  | -19.459 | 1.201  | 0.082        |
| <i>Fruits (s/week)</i>                                   | 2.190                          | 0.366   | 0.752   | 3.629  | <b>0.003</b> |
| <i>Vegetables (s/week)</i>                               | 0.811                          | 0.207   | -0.177  | 1.800  | 0.106        |
| <i>Pulses (s/week)</i>                                   | 0.215                          | 0.006   | -8.768  | 9.198  | 0.962        |
| <i>Fish (s/week)</i>                                     | 5.711                          | 0.275   | 0.552   | 10.870 | <b>0.031</b> |
| <i>Red meat and subproducts (s/week)</i>                 | -4.111                         | -0.272  | -7.868  | -0.355 | <b>0.032</b> |
| <i>Poultry (s/week)</i>                                  | 3.001                          | 0.084   | -6.214  | 12.217 | 0.517        |
| <i>Dairy products (s/week)</i>                           | -1.313                         | -0.226  | -2.772  | 0.147  | 0.077        |
| <i>Olive oil (s/week)</i>                                | -0.014                         | -0.002  | -1.746  | 1.719  | 0.987        |
| <i>Nuts (s/week)</i>                                     | 1.654                          | 0.198   | -0.462  | 3.771  | 0.123        |
| <b>Relative muscle strength (kg/body weight) (n=149)</b> |                                |         |         |        |              |
| <i>Whole-grain cereals (s/week)</i>                      | 0.002                          | 0.035   | -0.006  | 0.009  | 0.671        |
| <i>Potatoes (s/week)</i>                                 | 0.024                          | 0.134   | -0.005  | 0.052  | 0.102        |
| <i>Fruits (s/week)</i>                                   | 0.003                          | 0.114   | -0.001  | 0.008  | 0.168        |
| <i>Vegetables (s/week)</i>                               | 0.002                          | 0.090   | -0.001  | 0.005  | 0.275        |
| <i>Pulses (s/week)</i>                                   | -0.001                         | -0.008  | -0.031  | 0.028  | 0.922        |
| <i>Fish (s/week)</i>                                     | 0.005                          | 0.048   | -0.011  | 0.021  | 0.559        |
| <i>Red meat and subproducts (s/week)</i>                 | -0.005                         | -0.077  | -0.016  | 0.006  | 0.350        |
| <i>Poultry (s/week)</i>                                  | -0.034                         | -0.200  | -0.061  | -0.007 | <b>0.014</b> |
| <i>Dairy products (s/week)</i>                           | 0.002                          | 0.095   | -0.002  | 0.007  | 0.251        |
| <i>Olive oil (s/week)</i>                                | 0.001                          | 0.036   | -0.004  | 0.006  | 0.667        |
| <i>Nuts (s/week)</i>                                     | 0.005                          | 0.112   | -0.002  | 0.012  | 0.174        |
| <b>Flexibility (cm) (n=150)</b>                          |                                |         |         |        |              |
| <i>Whole-grain cereals (s/week)</i>                      | 0.071                          | 0.062   | -0.116  | 0.258  | 0.454        |
| <i>Potatoes (s/week)</i>                                 | 0.121                          | 0.026   | -0.638  | 0.880  | 0.753        |
| <i>Fruits (s/week)</i>                                   | 0.059                          | 0.072   | -0.074  | 0.192  | 0.384        |
| <i>Vegetables (s/week)</i>                               | 0.040                          | 0.083   | -0.038  | 0.117  | 0.312        |
| <i>Pulses (s/week)</i>                                   | -0.280                         | -0.058  | -1.059  | 0.499  | 0.479        |
| <i>Fish (s/week)</i>                                     | 0.340                          | 0.129   | -0.086  | 0.765  | 0.117        |
| <i>Red meat and subproducts (s/week)</i>                 | -0.250                         | 0.142   | -0.534  | 0.034  | 0.084        |
| <i>Poultry (s/week)</i>                                  | -0.847                         | -0.176  | -1.724  | 0.030  | 0.058        |
| <i>Dairy products (s/week)</i>                           | -0.046                         | -0.065  | -0.160  | 0.068  | 0.426        |
| <i>Olive oil (s/week)</i>                                | 0.050                          | 0.058   | -0.090  | 0.189  | 0.481        |
| <i>Nuts (s/week)</i>                                     | 0.078                          | 0.066   | -0.114  | 0.270  | 0.422        |
| <b>Overall physical fitness (z-score) (n=62)</b>         |                                |         |         |        |              |
| <i>Whole-grain cereals (s/week)</i>                      | 1.482                          | 0.201   | -0.384  | 3.348  | 0.117        |
| <i>Potatoes (s/week)</i>                                 | 0.043                          | 0.027   | -0.378  | 0.464  | 0.838        |
| <i>Fruits (s/week)</i>                                   | 3.426                          | 0.306   | 0.678   | 6.174  | <b>0.015</b> |
| <i>Vegetables (s/week)</i>                               | 6.227                          | 0.364   | 2.114   | 10.339 | <b>0.004</b> |
| <i>Pulses (s/week)</i>                                   | 0.072                          | 0.038   | -0.424  | 0.569  | 0.772        |
| <i>Fish (s/week)</i>                                     | 0.586                          | 0.182   | -0.232  | 1.403  | 0.157        |
| <i>Red meat and subproducts (s/week)</i>                 | -0.922                         | -0.208  | -2.040  | 0.196  | 0.104        |
| <i>Poultry (s/week)</i>                                  | -0.486                         | -0.260  | -0.952  | -0.021 | <b>0.041</b> |
| <i>Dairy products (s/week)</i>                           | 0.473                          | 0.041   | -2.502  | 3.448  | 0.752        |
| <i>Olive oil (s/week)</i>                                | 0.094                          | 0.009   | -2.481  | 2.670  | 0.942        |
| <i>Nuts (s/week)</i>                                     | 1.634                          | 0.204   | -0.390  | 3.657  | 0.112        |

S, servings.

**Supplementary Table S4.** Differences in dietary habits by meeting physical activity recommendations (not-meeting physical activity guidelines vs. meeting physical activity guidelines).

|                                          | <b>Not meeting PA<br/>recommendations<br/>(n=103)</b> | <b>Meeting PA<br/>recommendations<br/>(n=29)</b> | <b><i>p</i></b> |
|------------------------------------------|-------------------------------------------------------|--------------------------------------------------|-----------------|
| <i>Whole-grain cereals (s/week)</i>      | 3.9 (4.6)                                             | 7.2 (6.2)                                        | <b>0.012</b>    |
| <i>Potatoes (s/week)</i>                 | 2.5 (1.2)                                             | 1.9 (1.1)                                        | <b>0.017</b>    |
| <i>Fruits (s/week)</i>                   | 14.2 (7.5)                                            | 16.7 (6.6)                                       | 0.109           |
| <i>Vegetables (s/week)</i>               | 26.6 (11.9)                                           | 29.9 (11.2)                                      | 0.186           |
| <i>Pulses (s/week)</i>                   | 2.8 (1.3)                                             | 2.8 (1.2)                                        | 0.810           |
| <i>Fish (s/week)</i>                     | 4.8 (2.2)                                             | 5.7 (2.5)                                        | <b>0.053</b>    |
| <i>Red meat and subproducts (s/week)</i> | 5.6 (3.5)                                             | 6.0 (3.8)                                        | 0.561           |
| <i>Poultry (s/week)</i>                  | 2.8 (1.3)                                             | 2.8 (1.8)                                        | 0.910           |
| <i>Dairy products (s/week)</i>           | 12.4 (7.8)                                            | 13.8 (9.9)                                       | 0.409           |
| <i>Olive oil (s/week)</i>                | 12.9 (7.1)                                            | 15.3 (6.0)                                       | 0.100           |
| <i>Nuts (s/week)</i>                     | 4.6 (4.7)                                             | 7.7 (6.3)                                        | <b>0.021</b>    |

Values shown as mean (Standard deviation). PA, physical activity; S, servings.

**Supplementary Table S5.** Differences in dietary habits by smoking status (current smoker vs no smoker).

|                                          | <b>Non-smoker<br/>(n=139)</b> | <b>Current smoker<br/>(n=13)</b> | <b><i>p</i></b> |
|------------------------------------------|-------------------------------|----------------------------------|-----------------|
| <i>Whole-grain cereals (s/week)</i>      | 4.6 (5.3)                     | 1.2 (3.0)                        | <b>0.012</b>    |
| <i>Potatoes (s/week)</i>                 | 2.3 (1.3)                     | 3.0 (1.3)                        | 0.100           |
| <i>Fruits (s/week)</i>                   | 14.9 (7.2)                    | 10.0 (6.9)                       | <b>0.019</b>    |
| <i>Vegetables (s/week)</i>               | 25.5 (12.2)                   | 29.4 (14.9)                      | 0.273           |
| <i>Pulses (s/week)</i>                   | 2.7 (1.3)                     | 3.3 (0.6)                        | <b>0.007</b>    |
| <i>Fish (s/week)</i>                     | 4.9 (2.3)                     | 4.4 (2.0)                        | 0.421           |
| <i>Red meat and subproducts (s/week)</i> | 5.5 (3.5)                     | 6.7 (2.7)                        | 0.159           |
| <i>Poultry (s/week)</i>                  | 2.7 (1.4)                     | 2.9 (1.1)                        | 0.632           |
| <i>Dairy products (s/week)</i>           | 12.7 (8.4)                    | 14.7 (8.9)                       | 0.398           |
| <i>Olive oil (s/week)</i>                | 13.2 (6.9)                    | 11.3 (7.2)                       | 0.338           |
| <i>Nuts (s/week)</i>                     | 5.2 (5.1)                     | 4.4 (6.1)                        | 0.587           |
| <i>Sweetened beverages (s/week)</i>      | 1.6 (2.1)                     | 3.7 (2.9)                        | <b>0.024</b>    |

Values shown as mean (Standard deviation). S, servings.
